# Supplementary material
Source: PubMed Central journal article supplement (PMC3067323)
Supplement: supp_77_6_2113__1.pdf [file supp_77_6_2113__1.pdf]

## 1 SUPPLEMENTARY TABLES

2 TABLE S1. Terminal restriction fragments (TRF) of heat-sensitive bacteria associated with *E.*  
 3 *coli* O157:H7 suppression in the August 2008 experiment (n=4)<sup>a</sup>

| Dpi <sup>c</sup> | Bedding source <sup>d</sup> | Frequency of 31 candidate TRF <sup>b</sup> |                                      |                                                  | TRF <sup>h</sup>                                                              |
|------------------|-----------------------------|--------------------------------------------|--------------------------------------|--------------------------------------------------|-------------------------------------------------------------------------------|
|                  |                             | Fluorescence NH > HT (A) <sup>e</sup>      | Negative Regression (B) <sup>f</sup> | Fluorescence and Regression (A + B) <sup>g</sup> |                                                                               |
| 1                | Fresh                       | 10                                         | 8                                    | 4                                                | 99, 466, 480, 488                                                             |
| 1                | In-use <sup>i</sup>         | 6                                          | 2                                    | 0                                                | --                                                                            |
| 1                | Washed <sup>i</sup>         | 6                                          | 0                                    | 0                                                | --                                                                            |
| 1                | Recycled <sup>i</sup>       | 0                                          | 17                                   | 0                                                | --                                                                            |
| 15               | Fresh                       | 5                                          | 18                                   | 4                                                | 75, <b>130</b> , <b>139</b> , <b>156</b>                                      |
| 15               | In-use <sup>i</sup>         | 11                                         | 23                                   | 10                                               | 66, <b>130</b> , 136, <b>139</b> ,<br>142, 153, <b>156</b> , 490,<br>492, 495 |
| 15               | Washed <sup>i</sup>         | 6                                          | 0                                    | 0                                                | --                                                                            |
| 15               | Recycled                    | 3                                          | 10                                   | 0                                                | --                                                                            |

4 <sup>a</sup> Farm-derived livestock bedding samples each split into a non-heated (NH) and a heated (HT) sample were used for  
 5 a TRF analysis: TRFs <300 nt were at an accuracy of ± 1 nt; TRFs >300 nt were binned at ± 2 nt. Fragments that  
 6 occurred in more than one context are in bold.

7 <sup>b</sup> Thirty-one candidate TRFs with higher fluorescence in NH than the corresponding HT of a particular bedding  
 8 source were identified by visual inspection of interval plots.

9 <sup>c</sup> After cooling, samples were inoculated with a suspension of *E. coli* O157:H7, and incubated at 21 °C in the dark in  
 10 the laboratory. One and 15 dpi, colony forming units (CFU) of *E. coli* O157:H7 were determined, and DNA was  
 11 extracted.

12 <sup>d</sup> Livestock bedding from a sand recycling system at four independent strata: (i) Fresh, front of the cow box; (ii) In-  
 13 use, back of the cow box; (iii) Washed, used material from the pile following the sand manure separation; and (iv)  
 14 Recycled, rested (≥ 2 days) in a pile of washed material.

15 <sup>e</sup> The frequency of NH with stronger fluorescence than HT equivalents was determined by Mood's Median test at *P*  
 16 = 0.05; parameter (A).

17 <sup>f</sup> The frequency of the thirty-one candidate fragments that had a negative regression with CFUs of *E. coli*; parameter  
 18 (B).

19 <sup>g</sup> The frequency of TRFs that fulfilled both requirement (A) and (B).

20 <sup>h</sup> Identification of TRFs that fulfilled both requirements (A) and (B).

21 <sup>i</sup> CFU of *E. coli* O157:H7 were only numerically higher in HT than NT bedding material.

TABLE S2. Terminal restriction fragments (TRF) of heat-sensitive bacteria associated with *E. coli* O157:H7 suppression in the November 2008 experiment, n=8<sup>a</sup>

| Dpi <sup>c</sup> | Bedding source <sup>d</sup> | Frequency of 67 candidate TRF <sup>b</sup> |                                      |                                                  | TRF <sup>h</sup>                                                                                                                  |
|------------------|-----------------------------|--------------------------------------------|--------------------------------------|--------------------------------------------------|-----------------------------------------------------------------------------------------------------------------------------------|
|                  |                             | Fluorescence NH > HT (A) <sup>e</sup>      | Negative Regression (B) <sup>f</sup> | Fluorescence and Regression (A + B) <sup>g</sup> |                                                                                                                                   |
| 1                | Fresh                       | 18                                         | 2                                    | 0                                                | --                                                                                                                                |
| 1                | In-use <sup>i</sup>         | 17                                         | 16                                   | 7                                                | <b>96, 145, 151, 299, 488, 545, 548</b>                                                                                           |
| 1                | Washed <sup>i</sup>         | 13                                         | 12                                   | 4                                                | <b>96, 99, 299, 556</b>                                                                                                           |
| 1                | Recycled                    | 11                                         | 5                                    | 1                                                | <b>118</b>                                                                                                                        |
| 7                | Fresh                       | 31                                         | 16                                   | 11                                               | <b>87, 89, 94, 112, 115, 142, 149, 151, 299, 496, 541</b>                                                                         |
| 7                | In-use <sup>i</sup>         | 28                                         | 44                                   | 26                                               | <b>87, 89, 92, 94, 96, 99, 112, 115, 130, 136, 139, 142, 145, 147, 149, 297, 299, 456, 466, 469, 483, 486, 488, 496, 541, 550</b> |
| 7                | Washed                      | 35                                         | 0                                    | 0                                                | --                                                                                                                                |
| 7                | Recycled                    | 32                                         | 24                                   | 19                                               | <b>94, 99, 118, 122, 130, 136, 156, 202, 272, 275, 278, 280, 282, 297, 299, 483, 546, 548, 551</b>                                |

<sup>a</sup> Farm-derived livestock bedding samples each split into non-heated (NH) and heated (HT), and used for TRF analysis; TRFs <300 nt were at an accuracy of  $\pm 1$  nt; TRFs >300 nt were binned at  $\pm 2$  nt. Fragments that occurred in more than one context are in bold.

<sup>b</sup> Sixty-seven candidate TRFs with higher fluorescence in NH than the corresponding HT of a particular source were determined by visual inspection of interval plots.

<sup>c</sup> After cooling, samples were inoculated with a suspension of *E. coli* O157:H7, and incubated in the dark at 21 °C in the laboratory. One and seven dpi, colony forming units (CFU) of *E. coli* O157:H7 were determined and DNA extracted.

<sup>d</sup> Livestock bedding from a sand recycling system at eight independent strata of each of the following: (i) Fresh, front of the cow box; (ii) In-use, back of the cow box; (iii) Washed, used material from the pile following the sand manure separation; and (iv) Recycled, rested ( $\geq 2$  days) in a pile of washed material.

<sup>e</sup> The frequency of NH with stronger fluorescence than HT equivalents was determined by Mood's Median test at  $P = 0.05$ ; parameter (A).

<sup>f</sup> The frequency of the sixty-seven candidate fragments that had a negative regression with CFUs of *E. coli* O157:H7; parameter (B).

<sup>g</sup> The frequency of TRFs that fulfilled both requirement (A) and (B).

<sup>h</sup> Identification of TRFs that fulfilled both requirements (A) and (B).

TABLE S3. Terminal restriction fragments (TRF) of heat-sensitive bacteria associated with *E. coli* O157:H7 suppression in the March 2009 experiment, n=8<sup>a</sup>

| Dpi <sup>c</sup> | Bedding source <sup>d</sup> | Frequency of 78 candidate TRF <sup>b</sup> |                                      |                                                  | TRF <sup>h</sup>                                                                                                    |
|------------------|-----------------------------|--------------------------------------------|--------------------------------------|--------------------------------------------------|---------------------------------------------------------------------------------------------------------------------|
|                  |                             | Fluorescence NH>HT (A) <sup>e</sup>        | Negative Regression (B) <sup>f</sup> | Fluorescence and Regression (A + B) <sup>g</sup> |                                                                                                                     |
| 1                | Fresh                       | 33                                         | 19                                   | 11                                               | <b>89, 139, 142, 145, 149, 156, 184,</b> 465, 486, 533, <b>537</b>                                                  |
| 1                | In-use                      | 27                                         | 38                                   | 17                                               | 66, <b>85, 89, 96, 142, 149 152, 156, 184, 299, 308, 492, 495, 537, 548, 550, 554</b>                               |
| 1                | Washed                      | 21                                         | 24                                   | 5                                                | <b>87, 89, 142, 492,</b> 508                                                                                        |
| 1                | Recycled                    | 21                                         | 28                                   | 17                                               | <b>89, 96,</b> 99, <b>147, 156, 299,</b> 304, <b>308,</b> 488, <b>492, 495,</b> 500, 503, 505, <b>547, 550, 555</b> |
| 10               | Fresh                       | 15                                         | 17                                   | 2                                                | 163, <b>550</b>                                                                                                     |
| 10               | In-use                      | 30                                         | 35                                   | 15                                               | 85, <b>87,</b> 136, <b>142, 145, 147, 152,</b> 163, 202, 222, 304, 488, <b>492, 495,</b> 499                        |
| 10               | Washed                      | 24                                         | 16                                   | 3                                                | 92, 94, <b>547</b>                                                                                                  |
| 10               | Recycled                    | 17                                         | 15                                   | 1                                                | 122                                                                                                                 |

<sup>a</sup> Farm-derived livestock bedding samples each split into non-heated (NT) and heated (HT), and used for TRF analysis; TRFs <300 nt were at an accuracy of  $\pm 1$  nt; TRFs >300 nt were binned at  $\pm 2$  nt. Fragments that occurred in more than one context are in bold.

<sup>b</sup> Seventy-eight candidate TRFs with higher fluorescence in NH than the corresponding HT of a particular source were determined by visual inspection of interval plots.

<sup>c</sup> After cooling, samples were inoculated with a suspension of *E. coli* O157:H7, and incubated at 21 °C in the dark in the laboratory. One and ten dpi, colony forming units (CFU) of *E. coli* O157:H7 were determined and DNA extracted.

<sup>d</sup> Livestock bedding from a sand recycling system at eight independent strata of each of the following: (i) Fresh, front of the cow box; (ii) In-use, back of the cow box; (iii) Washed, used material from the pile following the sand manure separation; and (iv) Recycled, rested ( $\geq 2$  days) in a pile of washed material.

<sup>e</sup> The frequency of NH with stronger fluorescence than HT equivalents was determined by Mood's Median test at  $P = 0.05$ ; parameter (A).

<sup>f</sup> The frequency of the seventy-eight candidate fragments that had a negative regression with CFUs of *E. coli* O157:H7 were noted; parameter (B).

<sup>g</sup> The frequency of TRFs that fulfilled both requirement (A) and (B).

<sup>h</sup> Identification of TRFs that fulfilled both requirements (A) and (B).

1 TABLE S4. Terminal restriction fragments (TRF) of bacteria found to be more abundant  
 2 in non-heated (NH) recycled or washed bedding samples on 1 dpi or 7 dpi, respectively,  
 3 associated with *E. coli* O157:H7 suppression in the 10 November Experiment, n=8<sup>a</sup>

| Recycled <sup>c</sup> versus<br>Dpi <sup>d</sup> |                        | Frequency of 29 candidate TRF <sup>b</sup>              |                                            |                                                        | TRF <sup>h</sup>                                                                                |
|--------------------------------------------------|------------------------|---------------------------------------------------------|--------------------------------------------|--------------------------------------------------------|-------------------------------------------------------------------------------------------------|
|                                                  |                        | Fluorescence<br>Suppressive ><br>other (A) <sup>e</sup> | Negative<br>regression<br>(B) <sup>f</sup> | Fluorescence<br>and Regression<br>(A + B) <sup>g</sup> |                                                                                                 |
| 1                                                | Fresh <sup>c</sup>     | 13                                                      | 9                                          | 6                                                      | <b>118, 297, 299,</b><br><b>302, 306, 508</b>                                                   |
| 1                                                | In-use <sup>c</sup>    | 9                                                       | 9                                          | 5                                                      | <b>83, 118, 299, 302,</b><br><b>306</b>                                                         |
| 1                                                | Washed <sup>c</sup>    | 7                                                       | 9                                          | 4                                                      | <b>83, 118, 302, 508</b>                                                                        |
| Washed <sup>c</sup> versus                       |                        | Frequency of 28 candidate TRFs <sup>b</sup>             |                                            |                                                        | TRFs <sup>h</sup>                                                                               |
| 7                                                | Fresh <sup>c</sup>     | 12                                                      | n/a <sup>i</sup>                           | n/a                                                    | <b>118, 202, 269,</b><br><b>272, 275, 276,</b><br><b>278, 280, 282,</b><br><b>297, 543, 548</b> |
| 7                                                | In-use <sup>c</sup>    | 10                                                      | n/a                                        | n/a                                                    | <b>92, 118, 202, 272,</b><br><b>275, 276, 278,</b><br><b>280, 282, 543</b>                      |
| 7                                                | Recycled <sup>cj</sup> | 10                                                      | n/a                                        | n/a                                                    | <b>92, 118, 202, 272,</b><br><b>275, 276, 278,</b><br><b>280, 282, 543</b>                      |

4 <sup>a</sup> Farm-derived livestock bedding samples each split into a non-heated (NH) and a heated (HT) sample were  
 5 used for TRF analysis; TRFs <300 nt were at an accuracy of ± 1 nt; TRFs >300 nt were binned at ± 2 nt.  
 6 TRFs that occurred in more than one context are in bold; values of NH samples were compared.

7 <sup>b</sup> Twenty-nine (or 28) candidate TRFs with higher fluorescence in the most suppressive NH source  
 8 compared to the other NH sources at 1 dpi or 7 dpi were determined by visual inspection of interval plots.

9 <sup>c</sup> Livestock bedding from a sand recycling system at eight independent strata of each of the following: (i)  
 10 Fresh, front of the cow box; (ii) In-use, back of the cow box; (iii) Washed, used material from the pile  
 11 following the sand manure separation; and (iv) Recycled, rested (≥ 2 days) in a pile of washed material.

12 <sup>d</sup> After cooling, samples were inoculated with a suspension of *E. coli* O157:H7, and incubated in the dark at  
 13 21 °C in the laboratory. One and seven dpi, colony forming units (CFU) of *E. coli* O157:H7 were  
 14 determined and DNA extracted.

15 <sup>e</sup> The frequency of the more suppressive source with stronger fluorescence than the less suppressive  
 16 sources was determined by Mood's Median test at  $P = 0.05$ ; parameter (A).

17 <sup>f</sup> The frequency of the 29 candidate fragments that had a negative regression with CFUs of *E. coli*;  
 18 parameter (B).

19 <sup>g</sup> The frequency of TRFs that fulfilled both requirement (A) and (B).

20 <sup>h</sup> Identification of TRFs that fulfilled both requirements (A) and (B); only (A) for samples from 7 dpi.

21 <sup>i</sup> No CFUs were detected in the Washed bedding material. No test for regression could be conducted. The  
 22 higher frequency of TRFs is considered an overestimate of those involved in *E. coli* O157:H7  
 23 suppressiveness.

24 <sup>j</sup> CFU of *E. coli* O157:H7 were only numerically higher in the Recycled than the Washed bedding material.

25

1 TABLE S5. Terminal restriction fragments (TRF) of bacteria found to be more abundant  
 2 in non-heated (NH) recycled bedding samples and concomitant with *E. coli* O157:H7  
 3 suppression in a 23 March Experiment, n=8<sup>a</sup>

| Dpi <sup>c</sup> | Recycled <sup>d</sup><br>versus | Frequency of 14 candidate TRF <sup>b</sup>              |                                                        |                                                        | TRF <sup>h</sup>                                  |
|------------------|---------------------------------|---------------------------------------------------------|--------------------------------------------------------|--------------------------------------------------------|---------------------------------------------------|
|                  |                                 | Fluorescence<br>Suppressive > other<br>(A) <sup>e</sup> | Negative<br>regression in<br>Recycled (B) <sup>f</sup> | Fluorescence and<br>Regression (A +<br>B) <sup>g</sup> |                                                   |
| 1                | Fresh <sup>id</sup>             | 8                                                       | 10                                                     | 7                                                      | <b>99, 308, 500, 505,</b><br><b>508, 555, 623</b> |
| 1                | In-use <sup>d</sup>             | 5                                                       | 10                                                     | 4                                                      | <b>500, 505, 508, 623</b>                         |
| 1                | Washed <sup>d</sup>             | 4                                                       | 10                                                     | 3                                                      | <b>304, 308, 505</b>                              |
|                  | Washed <sup>d</sup><br>versus   | Frequency of 11 candidate TRFs                          |                                                        |                                                        |                                                   |
| 10               | Fresh <sup>d</sup>              | 3                                                       | 3                                                      | 0                                                      | --                                                |
| 10               | In-use <sup>dj</sup>            | 2                                                       | 3                                                      | 0                                                      | --                                                |
|                  | Recycled <sup>d</sup><br>versus | Frequency of 11 candidate TRFs                          |                                                        |                                                        |                                                   |
| 10               | Fresh <sup>d</sup>              | 3                                                       | 0                                                      | 0                                                      | --                                                |
| 10               | In-use <sup>dj</sup>            | 2                                                       | 0                                                      | 0                                                      | --                                                |

4 <sup>a</sup> Farm-derived livestock bedding samples each split into a non-heated (NH) and a heated (HT) sample, and  
 5 used for TRF analysis; TRFs <300 nt were at an accuracy of ± 1 nt; TRFs >300 nt were binned at ± 2 nt.  
 6 TRFs that occurred in more than one context are high-lighted in bold; values of NH samples were  
 7 compared.

8 <sup>b</sup> Fourteen (11, 11) candidate TRFs with higher fluorescence in more suppressive than the less suppressive  
 9 were determined by visual inspection of interval plots.

10 <sup>c</sup> After cooling, samples were inoculated with a suspension of *E. coli* O157:H7, and incubated at 21 °C in  
 11 the dark in the laboratory. One and ten dpi, colony forming units (CFU) of *E. coli* O157:H7 were  
 12 determined and DNA extracted.

13 <sup>d</sup> Livestock bedding from a sand recycling system at eight independent strata of each of the following: (i)  
 14 Fresh, front of the cow box; (ii) In-use, back of the cow box; (iii) Washed, used material from the pile  
 15 following the sand manure separation; and (iv) Recycled, rested (≥ 2 days) in a pile of washed material.

16 <sup>e</sup> The frequency of the more suppressive source with stronger fluorescence than the less suppressive  
 17 sources was determined by Mood's Median test at  $P = 0.05$  and recorded; parameter (A).

18 <sup>f</sup> The frequency of the candidate TRFs that had a negative regression with CFUs of *E. coli* O157:H7;  
 19 parameter (B).

20 <sup>g</sup> The frequency of TRFs that fulfilled both requirement (A) and (B).

21 <sup>h</sup> Identification of TRFs that fulfilled both requirements (A) and (B).

22 <sup>i</sup> The CFU of *E. coli* O157:H7 were not significantly different from the counts in Recycled samples.

23 <sup>j</sup> The CFU of *E. coli* O157:H7 were not significantly different from the counts in Washed, Recycled, or  
 24 Fresh samples.
